# Supplementary material for: The 'diagonal' approach to Global Fund financing: a cure for the broader malaise of health systems?
Source: Global Health. 2008 Mar 25;4:6. doi: 10.1186/1744-8603-4-6 (PMC2335098; doi:10.1186/1744-8603-4-6)
Supplement: Additional file 2 — Global Health Fund Needs. This table illustrates the needs of a Global Health Fund, aiming at increasing government health expenditure to US$40 per person per year by 2015. [file 1744-8603-4-6-S2.xls]

## Sheet: Sheet1
Global Health Fund Needs
A Low-income Countries according to World Bank classification in August 2006	B Population in 2005, in millions (Population Division of the United Nations Secretariat, May 2007)	C Population in 2015, in millions (Population Division of the United Nations Secretariat, May 2007)	D General Government Expenditure on Health to achieve US$ 40 per person per year in 2015, in US$ millions (C*38)	E GDP in US$ billions 1995 (IMF, September 2006)	F GDP in US$ billions 2005 (IMF, September 2006)	G Growth 1995-2005 % of GDP ((F-E)*100/E)	H GDP in US$ billions 2015 (F*(G+100)%)	I General Government Expenditure on Health if it was 3% of GDP in 2015 in US$ millions (H*1000*3%)	K Financing Gap 2015, adjusted to 0 if <0 (D-I)
Afghanistan	25.067	35.631	1425.24	n/a	7.309	n/a	n/a	n/a	n/a
Bangladesh	153.281	180.114	7204.56	39.58	61.208	54.6438	94.6544	2839.63	4364.93
Benin	8.49	11.331	453.24	2.17	4.406	103.041	8.94601	268.38	184.86
Bhutan	0.637	0.737	29.48	0.294	0.828	181.633	2.33192	69.9576	0
Burkina Faso	13.933	18.475	739	2.38	5.624	136.303	13.2897	398.69	340.31
Burundi	7.859	11.223	448.92	1	0.801	-19.9	0.641601	19.248	429.672
Cambodia	13.956	16.641	665.64	3.42	6.233	82.2515	11.3597	340.792	324.848
Central African Republic	4.191	5.021	200.84	1.122	1.376	22.6381	1.6875	50.625	150.215
Chad	10.146	13.429	537.16	1.466	5.896	302.183	23.7127	711.381	0
Comoros	0.798	1.007	40.28	0.232	0.388	67.2414	0.648897	19.4669	20.8131
Congo, Dem. Rep.	58.741	80.569	3222.76	5.643	7.096	25.7487	8.92313	267.694	2955.07
Côte d'Ivoire	18.585	22.343	893.72	11.001	16.373	48.8319	24.3683	731.048	162.672
Eritrea	4.527	6.165	246.6	0.589	0.961	63.1579	1.56795	47.0384	199.562
Ethiopia	78.986	100.967	4038.68	8.088	11.373	40.6157	15.9922	479.767	3558.91
Gambia, The	1.617	2.072	82.88	0.381	0.461	20.9974	0.557798	16.7339	66.1461
Ghana	22.535	27.294	1091.76	6.457	10.72	66.0214	17.7975	533.925	557.835
Guinea	9.003	11.449	457.96	3.694	3.331	-9.82675	3.00367	90.1101	367.85
Guinea-Bissau	1.597	2.16	86.4	0.254	0.302	18.8976	0.359071	10.7721	75.6279
Haiti	9.296	10.83	433.2	2.542	3.983	56.6876	6.24087	187.226	245.974
India	1134.4	1302.54	52101.4	355.624	780.784	119.553	1714.24	51427.1	0
Kenya	35.599	46.167	1846.68	11.944	18.73	56.8151	29.3715	881.144	965.536
Korea, Dem. Rep.	22.5	22.5	900	n/a	n/a	n/a	n/a	n/a	n/a
Kyrgyz Republic	5.204	5.782	231.28	1.494	2.46	64.6586	4.0506	121.518	109.762
Lao PDR	5.664	6.699	267.96	1.791	2.885	61.0832	4.64725	139.418	128.542
Liberia	3.442	5.032	201.28	n/a	0.529	n/a	n/a	n/a	n/a
Madagascar	18.643	24.107	964.28	3.16	5.034	59.3038	8.01935	240.581	723.699
Malawi	13.226	17.02	680.8	1.397	2.076	48.6042	3.08502	92.5507	588.249
Mali	11.611	15.655	626.2	2.817	5.412	92.1193	10.3975	311.925	314.275
Mauritania	2.963	3.757	150.28	1.415	1.857	31.2367	2.43707	73.112	77.168
Mongolia	2.581	2.858	114.32	1.227	2.094	70.6601	3.57362	107.209	7.1113
Mozambique	20.533	24.698	987.92	2.285	6.636	190.416	19.272	578.16	409.76
Myanmar	47.967	51.998	2079.92	5.487	12.151	121.451	26.9085	807.254	1272.67
Nepal	27.094	32.843	1313.72	4.401	7.515	70.7566	12.8324	384.971	928.749
Niger	13.264	18.754	750.16	1.881	3.403	80.9144	6.15652	184.696	565.464
Nigeria	141.356	175.715	7028.6	35.475	98.564	177.841	273.851	8215.53	0
Pakistan	158.081	190.659	7626.36	74.066	110.97	49.8258	166.262	4987.85	2638.51
Papua New Guinea	6.07	7.319	292.76	4.854	4.011	-17.3671	3.3144	99.4321	193.328
Rwanda	9.234	12.147	485.88	1.293	2.153	66.512	3.585	107.55	378.33
São Tomé and Principe	0.153	0.18	7.2	0.045	0.072	60	0.1152	3.456	3.744
Senegal	11.77	14.878	595.12	4.879	8.615	76.5731	15.2118	456.353	138.767
Sierra Leone	5.586	6.929	277.16	0.872	1.215	39.3349	1.69292	50.7876	226.372
Solomon Islands	0.472	0.589	23.56	0.357	0.294	-17.6471	0.242118	7.26353	16.2965
Somalia	8.196	10.881	435.24	n/a	n/a	n/a	n/a	n/a	n/a
Sudan	36.9	45.613	1824.52	7.32	27.895	281.079	106.302	3189.06	0
Tajikistan	6.55	7.703	308.12	0.569	2.311	306.151	9.38615	281.585	26.5354
Tanzania	38.478	48.999	1959.96	5.631	12.607	123.886	28.2253	846.758	1113.2
Timor-Leste	1.067	1.504	60.16	n/a	0.35	n/a	n/a	n/a	n/a
Togo	6.239	8.045	321.8	1.446	2.112	46.0581	3.08475	92.5424	229.258
Uganda	28.947	39.966	1598.64	5.582	8.734	56.4672	13.6658	409.975	1188.66
Uzbekistan	26.593	30.645	1225.8	10.168	13.67	34.4414	18.3781	551.344	674.456
Vietnam	85.029	96.467	3858.68	20.737	53.053	155.837	135.729	4071.88	0
Yemen, Rep.	21.096	28.288	1131.52	12.757	15.193	19.0954	18.0942	542.825	588.695
Zambia	11.478	13.842	553.68	3.47	7.271	109.539	15.2356	457.067	96.6128
Zimbabwe	13.12	14.508	580.32	7.152	4.552	-36.3535	2.89719	86.9157	493.404
Total	2364.08	2817.19	112688	681.909	1365.69		2896.34	86890.3	28102.5
n/a: not available
